# Human spinal cord activation during filling and emptying of the bladder

K. A. Agyeman<sup>1,\*</sup>, D.J. Lee<sup>2,3,4,6\*</sup>, A. Abedi<sup>2,3</sup>, S. Sakellaridi<sup>1</sup>, E.I. Kreydin<sup>2,3,4,5</sup>, J. Russin<sup>2,3,4,6</sup>, Y.T. Lo<sup>2,3,7</sup>, K. Wu<sup>2,3</sup>, W. Choi<sup>2,3</sup>, V.R. Edgerton<sup>3,4</sup>, C. Liu<sup>2,3,4,5,6,§</sup> and V.N. Christopoulos<sup>1,2,3,8,§</sup>

<sup>1</sup>Department of Bioengineering, University of California Riverside, Riverside, CA, USA

<sup>2</sup>Department of Neurological Surgery, Keck School of Medicine, University of Southern California, Los Angeles, CA, USA

<sup>3</sup>Neurorestoration Center, Keck School of Medicine, University of Southern California, Los Angeles, CA, USA

<sup>4</sup>Rancho Los Amigos National Rehabilitation Center, Downey, CA, USA

<sup>5</sup>Institute of Urology, Keck School of Medicine, University of Southern California, Los Angeles, CA, United States

<sup>6</sup>Department of Biomedical Engineering, Viterbi School of Engineering, University of Southern California, Los Angeles, CA, USA

<sup>7</sup>Department of Neurosurgery, National Neuroscience Institute, Singapore

<sup>8</sup>Neuroscience Graduate Program, University of California Riverside, Riverside, CA, USA

\* These authors contributed equally

§ These authors jointly supervised this work (Correspondence)

25 Corresponding author: C. Liu, MD, PhD  
26 Professor of Clinical Neurological Surgery  
27 Director, USC Neurorestoration Center  
28 Department of Neurological Surgery  
29 Keck School of Medicine  
30 1975 Zonal Ave.  
31 Los Angeles, CA 90033  
32 Tel: +1 (323) 226-7421  
33 [cliu@usc.edu](mailto:cliu@usc.edu)

34  
35 Corresponding author: V. Christopoulos, PhD  
36 Assistant Professor of Bioengineering  
37 University of California Riverside  
38 N Campus Dr,  
39 Riverside, CA 92507  
40 Bourns Hall A-131  
41 Tel: +1 (951) 827-4303  
42 [vchristo@engr.ucr.edu](mailto:vchristo@engr.ucr.edu)

43

44 **Abstract**

45

46 Recording neural activity from the spinal cord is crucial for gaining insights into how it  
47 functions. However, the neural activity of the human spinal cord is notoriously difficult to  
48 measure. The bony and fascial enclosures combined with the relatively small anatomic  
49 size of the spinal cord make it an unfavorable target for traditional functional neuroimaging  
50 techniques. Functional ultrasound imaging (fUSI) is an emerging neuroimaging  
51 technology that represents a new platform for studying large-scale neural dynamics with  
52 high sensitivity, spatial coverage and spatiotemporal resolution. Although it was originally  
53 developed for studying brain function, fUSI was recently extended for imaging the spinal  
54 cord in animals and humans. While these studies are significant, their primary focus is on  
55 the neuroactivation of the spinal cord in response to external sensory stimulations. Here,  
56 we combined fUSI with urodynamically-controlled bladder filling and emptying to  
57 characterize the hemodynamic response of the human spinal cord during the micturition  
58 cycle. Our findings provide the first practical evidence of the existence of bladder  
59 pressure-responsive regions, whose hemodynamic signal is strongly correlated with the  
60 bladder pressure.

61

62 *Keywords:* Spinal cord, functional ultrasound imaging (fUSI), urodynamics, micturition,  
63 bladder, functional neuroimaging

64

65

66

## 67 **Introduction**

68 The spinal cord has been frequently neglected in the study of neural function. As a result,  
69 its anatomy and physiology are not as well understood as those of the brain. Yet, it  
70 represents the first evolutionary step in central nervous system development and houses  
71 the neural circuitry that controls and modulates some of the most important functions of  
72 life <sup>1</sup>. Neural networks capable of producing autonomous central commands – usually  
73 stereotyped and rhythmic motor behaviors – are present throughout the rostral and the  
74 caudal parts of the spinal cord<sup>2</sup>. Actions such as chewing, swallowing and breathing are  
75 thought to be partially produced by these networks in the rostral cord <sup>3</sup>. Similarly,  
76 autonomic functions such as urination and defecation are under control of neural  
77 networks located in the caudal spinal cord <sup>4</sup>.

78

79 Although evidence for the existence of neural network circuits that control and regulate  
80 certain body processes is strong, its demonstration in humans has been challenging to  
81 achieve. The bony, fascial enclosure and small cross-section dimensions (approximately  
82 12 mm in diameter) of the spinal cord combined with susceptibility artifacts due to local  
83 magnetic field inhomogeneities generated by interfaces between surrounding bones,  
84 ligaments, soft tissues and cerebrospinal fluid (CSF) make the spinal cord an unfavorable  
85 target for traditional neuroimaging techniques, such as functional magnetic resonance  
86 imaging (fMRI) <sup>5–11</sup>. As a result, the bulk of our understanding of spinal cord function  
87 comes from animal and lesioning studies <sup>12</sup>. There is little direct evidence for function-  
88 specific spinal cord activity in humans, and fMRI – which has shed so much light on brain  
89 functions in humans – of the spinal cord is only minimally developed and generally

90 restricted to the cervical cord<sup>8-10,13</sup>. Given this context, there is a clear and distinct need  
91 for developing neurotechnologies that make the functional study of the human spinal cord  
92 more accessible.

93

94 Functional ultrasound imaging (fUSI) is an emerging neuroimaging technology that  
95 represents a new platform with high sensitivity, spatial coverage and spatiotemporal  
96 resolution, enabling a range of new pre-clinical and clinical applications<sup>14-23</sup>. It was  
97 originally developed for brain neuroimaging in small animals (i.e., rodents)<sup>16</sup>. Based on  
98 power Doppler imaging, fUSI measures changes in cerebral blood volume (CBV) by  
99 detecting backscattered echoes from red blood cells moving within its field of view<sup>24,25</sup>.

100 While fUSI is a hemodynamic technique, its superior spatiotemporal performance (i.e.,  
101 100  $\mu\text{m}$  and up to 10 ms) and sensitivity ( $\sim 1$  mm/s velocity of blood flow) offer  
102 substantially closer connection to the underlying neuronal signal than achievable with  
103 other hemodynamic methods such as fMRI. It is minimally invasive and requires a  
104 trephination in large organisms to enable the penetration of the ultrasound waves, as the  
105 skull attenuates the acoustic wave. The fUSI scanner is like any clinical ultrasound  
106 machine, making the unit freely mobile between different settings and negates the need  
107 for extensive infrastructure inherent to fMRI.

108

109 Recently, fUSI was extended to study the spinal cord responses to electrical and  
110 mechanical stimulations in small animals and human patients<sup>26-30</sup>. Despite the significant  
111 contribution of these studies in understanding how the spinal cord reacts to external  
112 sensory stimulations, none of them have demonstrated spinal cord circuits associated

113 with physiological functions (i.e., body processes) in humans. In the current study, we  
114 utilize fUSI to study the hemodynamic response of the spinal cord during urinary bladder  
115 filling and emptying in patients, undergoing general anesthesia and epidural spinal  
116 stimulation surgery for chronic low back pain treatment. By combining fUSI recordings  
117 from the spinal cord with intravesical bladder pressure recordings, we identified spinal  
118 cord regions in which the hemodynamic signal is strongly correlated with bladder  
119 pressure. Overall, our study provides the first in-human application of fUSI to characterize  
120 the hemodynamic response of the spinal cord during urodynamically-controlled bladder  
121 filling and emptying, opening new avenues for better understanding the mechanisms of  
122 control that the spinal cord exerts over micturition.

123

124

## 125 **Results**

126 To investigate how human spinal cord hemodynamics respond to bladder filling and  
127 emptying process, we acquired fUSI images of the spinal cord from four (4) chronic low  
128 back pain patients, who underwent standard-of-care implantation of an epidural spinal  
129 cord stimulation (ESCS) device under general anesthesia (Fig. 1A). Note that the  
130 urodynamic experiment was performed before ESCS implantation. A miniaturized 15.6-  
131 MHz, 128-channel, linear ultrasound transducer array was inserted through a partial  
132 laminar opening onto the dura at the level of the 10th thoracic vertebra (T10) with a  
133 transverse field of view (Fig. 1A). We utilized a protocol that consisted of about 26 min of  
134 continuous fUSI signal acquisition, including 5 min of baseline activity, followed by 2  
135 bladder filling cycles and 1 emptying cycle, interspersed by 2 hold periods (about 1 min

136 each) (Fig. 1B). The bladder was filled and emptied, accompanied by continuous  
137 intravesical bladder pressure recordings using a Laborie Goby™ (Vermont, USA)  
138 urodynamics system. The same protocol was employed for all patients. Fig. 1C depicts  
139 the changes of the bladder pressure during filling and emptying for all 4 patients.

140

---

141 Figure 1 around here

---

142

143 *Hemodynamic response induced by bladder filling and emptying.*

144 Power Doppler (pD)-based functional ultrasound images were acquired from the spinal  
145 cord (Fig. 2). We used the mean spinal cord pD signal (1 min just before filling onset) to  
146 capture the anatomical vascularization of the human spinal cord in all patients, with the  
147 dorsal surface indicated by the white discontinuous lines (Fig. 2B). The pD images have  
148 spatial resolutions of  $100\ \mu\text{m} \times 100\ \mu\text{m}$  in-plane, plane thickness of about  $400\ \mu\text{m}$ , and a  
149 large field of view (FOV)  $12.8\ \text{mm} \times 10\ \text{mm}$ . The FOV captures the dorsal and portions  
150 of the ventral cross-section of the spinal cord – approximately indicated by the light-green  
151 rectangular overlay in Fig. 2A.

152

---

153 Figure 2 around here

---

154



155 To characterize the spinal cord hemodynamic response during filling and emptying of the  
156 bladder, we computed the spinal cord blood volume changes ( $\Delta$ SCBV) – i.e., % pD signal  
157 changes – relative to the baseline activity (i.e., average fUSI activity 1 min prior to start  
158 filling the bladder). The goal was to identify regions within the spinal cord that are  
159 correlated with bladder pressure. To do so, we computed the *activation map* for each  
160 patient by performing a Pearson's correlation analysis between the bladder pressure  
161 changes and  $\Delta$ SCBV for each pixel in the recorded area. The activation maps revealed  
162 spinal cord regions that are positively (reddish areas,  $r > 0.35$ ,  $p < 0.01$ ) and negatively  
163 (blueish areas,  $r < -0.35$ ,  $p < 0.01$ ) correlated with bladder pressure during filling and  
164 emptying the bladder (Fig. 3A). Notably, we observed bladder pressure-related regions  
165 extending beyond the dorsal surface, indicating that neural signals associated with  
166 bladder function may modulate hemodynamic activity in regions adjacent to the gray  
167 matter of the spinal cord. It is also likely that the activation detected in vessels outside the  
168 dorsal column may be attributed to their role in supplying blood to the vasculature within  
169 the gray matter.

170  
171 To assess the temporal pattern of activation of the bladder pressure-related regions, we  
172 computed the average  $\Delta$ SCBV over the pixels of the positive and negative correlates to  
173 the bladder pressure, across time and patients. Since the magnitude of the hemodynamic  
174 response changes varies between patients (Fig. 3B), we normalized the  $\Delta$ SCBV between  
175 [-1, 1]. Similarly, we normalized the bladder pressure between [0, 1] to account for the  
176 different magnitudes of the pressure curves across patients. The results presented in Fig.  
177 3C showed that bladder filling and emptying cause strong neuroactivation in the spinal

178 cord. The regions positively correlated with the bladder pressure signal (i.e., red regions)  
179 exhibited a gradual increase in  $\Delta$ SCBV during bladder filling with a subsequent gradual  
180 decrease in  $\Delta$ SCBV during bladder emptying. Conversely, the regions negatively  
181 correlated with bladder pressure (i.e., blue regions) exhibited the opposite behavior – i.e.,  
182 gradual decrease followed by increase of  $\Delta$ SCBV during filling and emptying of the  
183 bladder, respectively. The gray curve depicts the average normalized bladder pressure  
184 changes across patients. The shaded regions around the bladder pressure and the  
185  $\Delta$ SCBV curves represent the standard error of mean across patients. The correlation  
186 between the bladder pressure and  $\Delta$ SCBV is  $0.89 \pm 0.02$  (Mean  $\pm$  SE) for the positively  
187 (reddish) and  $-0.78 \pm 0.05$  for the negatively (blueish) bladder pressure-related spinal  
188 cord regions across patients.

189

190

---

Figure 3 around here

---

191

192 *A machine learning algorithm to identify bladder pressure-related regions*

193 We investigated whether we could detect spinal cord regions that encode the bladder  
194 pressure dynamics without directly monitoring the bladder pressure. To do so, we  
195 developed a machine learning technique to identify bladder pressure-related regions in  
196 the recorded images (Fig. 4). After collecting the fUSI data from the human spinal cord  
197 (Fig. 4A), we implemented a class-wise principal component analysis (cPCA) to reduce  
198 the dimensionality of the spinal cord imaging data ( $91 \times 128$  pixels per acquired image),  
199 and extracted effective discriminant features to differentiate between bladder filling

200 (class:0, c0) and emptying (class:1, c1) classes (Fig. 4B). The entire fUSI spinal cord time  
201 series data acquired during filling and emptying periods were utilized (the hold time  
202 periods were excluded). The analysis was performed separately for each patient in whom  
203 the bladder pressure was successfully recorded (N=4). cPCA has been used to reduce  
204 sparsity and dimensionality while maintaining enough components to retain over 95%  
205 variance in the data (see Materials and Methods section for more details). It is ideally  
206 suited for discrimination problems with large dimensions and small sample size including  
207 natural and biomedical images<sup>31,32</sup>. We paired cPCA with a class-discriminant support  
208 vector machine (SVM) classifier to determine the best decision boundary that separate  
209 the two classes - i.e., filling vs. emptying (Fig. 4C). A subset from each class was then  
210 separated into training (80%) and testing (20%) sets for cross-validation analysis. This  
211 approach results in a 1D low-dimension subspace that represents a feature extraction  
212 mapping from the 2D spinal cord image space. The subspace identifies pixels in the spinal  
213 cord fUSI images that encode differences between the filling (c0) and emptying (c1)  
214 classes, when projected back to the image space. Each pixel was assigned a relative  
215 weight of relevance normalized between [-1 1] – pixels with values close to +1 or -1 imply  
216 important components, while pixels with values close to 0 are less important with their  
217 fluctuations likely due to noise with respect to each class (Fig. 4C). Physically, the  
218 weighted regions can be interpreted as spinal cord regions in where  $\Delta$ SCBV encodes  
219 differences between the filling and emptying classes. The positive and negative weights  
220 indicate that  $\Delta$ SCBV contributes positively and negatively to the variation captured by the  
221 principal component, respectively. Hence,  $\Delta$ SCBV of pixels that have positive and  
222 negative relative weights are positively and negatively correlated with the bladder

223 pressure. The heat-map in Fig. 4D (left-top column) represents a typical example of the  
224 decoding analysis that identifies the most relevant spinal cord image pixels associated  
225 with filling and emptying the bladder for patient 1 – the most positive (reddish) and  
226 negative (bluish) relative weighted pixels overlaid on a grayscale mean fUSI spinal cord  
227 vascular map. Fig. 5A depicts the top 5% of the most heavily weighted pixels generated  
228 by the cPCA+SVM algorithm. The results showed that the average  $\Delta$ SCBV of the  
229 activated regions was correlated with the bladder pressure with  $r = 0.65 \pm 0.09$ , (mean  $\pm$   
230 SE) for the positive weights and  $r = -0.62 \pm 0.08$  for the negative weights across the 4  
231 patients (Fig. 5C). Notably, the cPCA+SVM algorithm identified bladder pressure-related  
232 regions with less variability on the magnitude of the hemodynamic changes (i.e., %pD  
233 signal changes) during filling/emptying the bladder (Fig. 5B) compared to the original  
234 Pearson's correlation analysis and the activation maps (see Fig. 3B).

235

---

236 Figure 4 around here

---

237

238

---

239 Figure 5 around here

---

240

241 *Optimal amount of data for decoding bladder pressure dynamics*

242 So far, we have demonstrated that cPCA+SVM algorithm can accurately identify bladder  
243 pressure-related spinal cord regions. An interesting question is whether we can improve  
244 the cPCA+SVM performance using a subset of fUSI data – instead of entire data set – to

245 train the classifier. The goal is to determine the optimal amount of data needed to train  
246 the classifier to detect the spinal cord regions that produce the best performance – i.e.,  
247 the highest correlation between  $\Delta$ SCBV of the bladder pressure-related spinal cord  
248 regions (i.e., as extracted by the cPCA+SVM algorithm) and the bladder pressure  
249 dynamics. To do so, we started with the last 30 s of fUSI data acquired during bladder  
250 filling for class c1, and the first 30 s of fUSI data acquired during bladder emptying for  
251 class c0. We employed 10-s data increment for each class – i.e., positive increment for  
252 class c0, and negative increment for class c1 – to derive a cumulative set of fUSI images  
253 that was used to train and evaluate the performance of the algorithm. We utilized similar  
254 cPCA+SVM decoding steps as outlined above with increasing data amounts. Each subset  
255 of data produced weighted relevant pixels that best discriminate between the two classes.  
256 A characteristic example of the weighted relevant pixels with the corresponding average  
257  $\Delta$ SCBV time course curves is illustrated in Fig. 4D (right column), in which the red and  
258 blue curves represent the average  $\Delta$ SCBVs in areas with positive and negative weights,  
259 respectively. We then determined the optimal amount of fUSI data for each patient, in  
260 which the  $\Delta$ SCBV of the weighted pixels exhibit the highest correlation with the bladder  
261 pressure (Fig. 4D highlighted area). The results showed that the cPCA+SVM algorithm  
262 produced activation maps comparable to those generated by using all recorded fUSI data  
263 (Fig. 6A), yet with enhanced performance. Specifically, there was a greater correlation  
264 between  $\Delta$ SCBV and bladder pressure when utilizing a subset of the recorded fUSI data,  
265 as opposed to the entire dataset – i.e.,  $r = 0.81 \pm 0.05$ , (mean  $\pm$  SE) for the positive  
266 weights when using  $4.89 \pm 0.57$  min of the recorded fUSI images, and  $r = -0.85 \pm 0.03$  for  
267 the negative weights when using  $3.58 \pm 1.28$  min of the recorded fUSI images, across the

268 4 patients (Fig. 6C). Notably, the variability of the %pD signal change during  
269 filling/emptying the bladder across the 4 patients was comparable to those generated  
270 when utilizing all the amount of recorded fUSI data (Fig. 6B).

271

272

273

---

Figure 6 around here

---

274

275

## 276 **Discussion**

277

### 278 *General*

279 While functional neuroimaging in the human brain has led to some progress in  
280 understanding brain function in micturition<sup>33–35</sup>, the neural mechanism in the human  
281 spinal cord that controls filling and emptying of the bladder is almost entirely unclear. To  
282 the best of our knowledge, there is no study that has attempted to characterize  
283 hemodynamic changes in the spinal cord during filling and emptying of the bladder. One  
284 of the main reasons seems to be the intricate structure of the spinal cord, including its  
285 small cross-sectional area, the cardiac-related motion of cerebrospinal fluid (CSF), and  
286 motion artifacts caused by the proximity of organs such as the lungs. These factors make  
287 the spinal cord an unfavorable area for conventional functional neuroimaging studies<sup>5,8</sup>.  
288 On the other hand, electrophysiology suffers from the inherent trade-offs between  
289 sampling density, coverage and channel count, making it challenging to achieve a spatial  
290 sampling resolution of less than 100  $\mu\text{m}$  over a large recorded volume (i.e., 1  $\text{cm}^3$  would

291 require about  $10^6$  channels). Optical imaging is capable of monitoring single-neuron  
292 activity over large areas, but is typically limited by a penetration depth of  $< 1$  mm<sup>36,37</sup>.

293

294 Within this context, fUSI represents an emerging neuroimaging technology that utilizes  
295 ultrasound to monitor blood flow changes as an indirect readout of neuronal activity with  
296 high spatiotemporal resolution, penetration depth and sensitivity to slow blood flow  
297 motion. Originally developed for brain neuroimaging, fUSI has been recently expanded to  
298 study spinal neurovascular responses in small animals<sup>26–29</sup> and human patients<sup>30</sup>.  
299 Although these studies provide significant insights into better understanding the  
300 physiology of the spinal cord in sensory integrations, they are limited to artificial external  
301 stimulations, illustrating that fUSI is capable of detecting binary discrete spinal cord  
302 states— i.e., stimulation on vs. stimulation off. In the current study, we took the next major  
303 leap in fUSI spinal cord research by recording functional activity of the human spinal cord  
304 during urodynamically-controlled bladder filling and emptying. We showed that fUSI can  
305 detect spinal cord regions in which the hemodynamic signal is highly correlated with the  
306 bladder pressure. We also introduced a machine learning algorithm that can detect  
307 bladder pressure-related spinal cord regions, even when information about the bladder  
308 pressure is not available. Overall, our success in characterizing and correlating spinal  
309 cord hemodynamics to urodynamically-controlled micturition events holds promise for  
310 further understanding the functional and dysfunctional anatomy associated with lower  
311 urinary tract physiology.

312

313 *Neuroscience and scientific applications*

314 The unique combination of fUSI technology with anatomically correlated and easily  
315 monitored physiological function of micturition – mimicked by urodynamically-controlled  
316 filling and emptying of the bladder – open new opportunities for better understanding of  
317 the spinal cord networks that promote urinary storage and induce urinary emptying. It also  
318 creates avenues for studying the neural circuitries that control and modulate other  
319 important bodily functions, such as sensation, ambulation (e.g., passive movements in  
320 anesthetized patients). Additionally, the existence of spinal cord regions, where the  
321 hemodynamic signals are strongly correlated with bladder pressure, provides the proof-  
322 of-concept for developing ultrasound-based spinal cord machine interface technologies  
323 for bladder control in patients with neurogenic bladder. Surveys have repeatedly revealed  
324 that restoration of bladder function remains the top priority for spinal cord injury patients,  
325 far ahead of even restoring the ability to walk<sup>38</sup>. In addition to spinal cord injury, a far  
326 greater number of people worldwide suffer from urinary dysfunctions of neurological  
327 origin. Developing spinal cord machine interfaces for informing the patients about the  
328 state of the bladder would be a step closer to restoring bladder control.

329

330 *New avenues for improving neuromodulation treatments for neurogenic lower urinary*  
331 *tract dysfunction*

332 Urinary dysfunctions of neurological origin due to spinal cord or brain injury, degeneration,  
333 or stroke represent some of the biggest medical burdens in the world and lead to uniquely



334 dehumanizing consequences<sup>39</sup>. Therapies that are currently available abate some  
335 symptoms of neurogenic lower urinary tract dysfunction, but none can restore normal  
336 function. On the other hand, novel neuromodulatory approaches such as epidural spinal  
337 cord stimulation (ESCS) of the lumbosacral spinal cord have shown potential to activate  
338 neural networks associated with bladder function in rodents with SCI and thus lead to a  
339 degree of functional recovery<sup>40,41</sup>. Additionally, clinical studies have shown that  
340 transcutaneous electrical spinal cord stimulation (TSCS) – i.e., a non-invasive  
341 neuromodulation therapy that stimulates the spinal cord from the surface of the skin – can  
342 reengage the spinal circuits involved in bladder control and normalize bladder and  
343 urethral sphincter function in patients with SCI<sup>42,43</sup>. Although neuromodulation therapies  
344 offer a great promise for restoring normal lower tract function, their mechanism of action  
345 (MOA) remain elusive. This is mainly due to the lack of a monitoring modality that can  
346 characterize the effects of neuromodulation on spinal cord activity. Combining fUSI with  
347 neuromodulation of spinal networks has considerable potential in gaining a better  
348 understanding of the MOA of neuromodulation and augmenting its efficacy in improving  
349 bladder control in patients with neurogenic lower urinary tract dysfunction. Fine-tuning  
350 stimulation wave properties, such as amplitude, frequency, and shape, using fUSI has  
351 the potential to facilitate the objective identification of efficacious targets for  
352 neuromodulation.

353

354 *Limitations and Clinical challenges*

355 While fUSI is a novel technology that enables the monitoring of brain and spinal cord  
356 activity, the skull and the lamina bone attenuate and result in aberrant acoustic waves at  
357 high frequencies, substantially reducing signal sensitivity. For this reason, most fUSI  
358 applications are minimally invasive – with few exceptions such as in young mice (8-12  
359 weeks old with thin skull)<sup>44</sup> and in pediatric transfontanelle-imaging<sup>17,45</sup>. Surgical  
360 procedures to produce a craniotomy<sup>21</sup> or thinned-skull window<sup>46</sup> in brain research and  
361 laminectomy<sup>26,30</sup> in spinal cord research are required to harness the host of fUSI benefits.  
362 Hence, monitoring spinal cord neuroactivation with fUSI in awake adults is challenging  
363 and has yet to be proven. However, recent studies in brain research provide evidence  
364 that non-invasive fUSI is capable either through a permanent “acoustic window” installed  
365 as part of a skull replacement procedure following a decompressive hemicraniectomy  
366 (partial skull removal)<sup>47</sup> or by intravenously injecting microbubbles-contrast agents for  
367 enhancing the fUSI signal<sup>48,49</sup>. Although these approaches have not yet been tested in  
368 spinal cord research, the promise of fully noninvasive fUSI in spinal cord is imminent.

369

370 It is important to acknowledge that we recorded activity in the thoracic cord (T10 lamina),  
371 although the main control mechanism of the bladder is thought to be located in the sacral  
372 cord between S2-S4, with the major portion at S3<sup>2,50</sup>. This is a typical limitation in clinical  
373 studies that often we are not able to record activity directly from the desirable locations.  
374 In our study, we image the spinal cord during urodynamically-controlled micturition in  
375 patients undergoing ESCS surgery for chronic low back pain treatment. The midline of  
376 the spinal cord at the T10 lamina is the preferred location for insertion of a more rostral

377 spinal cord stimulator and therefore the laminectomy allows us to perform functional  
378 neuroimaging only at the T10 region. However, this clinical limitation does not affect our  
379 main finding that the hemodynamic signal within the T10 area encodes bladder pressure.  
380 In fact, this finding supports the prevailing hypothesis that micturition is regulated by  
381 neural circuits that traverse the entire central nervous system from the sacral cord to the  
382 prefrontal cortex and vice versa. When the sacral cord receives the sensory information  
383 from the bladder, this signal travels up the spinal cord to higher centers in the pons and  
384 above<sup>12</sup>. Also, the signal from the brain in turn travels down to the spinal cord to make  
385 sure that we only urinate when and where is appropriate<sup>51</sup>. Therefore, it is likely that the  
386 bladder pressure-related signal that we detect at the T10 vertebral body level is a  
387 combination of the signal initiated at the sacral cord that traveled towards higher brain  
388 centers, and the signal that is transferred from the brain to the bladder through the spinal  
389 cord.

390 Furthermore, while it is common in animal spinal cord studies to perform large  
391 laminectomies, retract back muscles and remove connective tissues<sup>26-29</sup>, it is not  
392 possible to modify the surgical protocol in order to improve the quality of the fUSI images  
393 in human experiments. Instead, we performed only partial and small laminectomies to  
394 avoid spine destabilization. In particular, the width of the laminar opening (about 11 mm)  
395 was smaller than the width of the ultrasound probe (12.8 mm) and consequently the probe  
396 did not perfectly abut the dura. Therefore, it is challenging to image the exactly same 2D  
397 plane across patients. Although the imaging planes vary slightly across the 4 patients,  
398 this does not affect the spatiotemporal pattern of the hemodynamic signal in the bladder

399 pressure-related regions. In fact, this highlights the strength and robustness of fUSI to  
400 overcome the potential to image different 2D slices of the spinal cord across patients.

401

## 402 **Conclusions**

403 Taken together, we present the first in-human characterization of spinal cord  
404 hemodynamics during physiological activation of the bladder. By combining fUSI with  
405 urodynamically-controlled bladder filling and emptying in human patients with spinal cord  
406 laminectomy, we identified spinal cord regions where the hemodynamic signal is strongly  
407 correlated with the bladder pressure. These findings demonstrate the existence of a  
408 network that is involved in micturition, and open new doors for further investigation of  
409 neural network circuits that control and regulate other body processes in healthy and  
410 disease conditions.

411

412

## 413 **Materials and Methods**

### 414 *Patient and surgical procedures*

415 A total of four participants were imaged continuously during bladder filling and emptying  
416 in this study. The participants were recruited from patients who underwent standard-of-  
417 care implantation of a spinal cord stimulator paddle lead (Penta™ model 3228) at the  
418 Keck School of Medicine of the University of Southern California (USC). All patients were  
419 diagnosed with failed back surgery syndrome, which required a T10 partial laminectomy  
420 for insertion of stimulation paddle lead in the prone position under general anesthesia.

421 Spinal cord hemodynamic responses to bladder filling and emptying were acquired via  
422 insertion of a fUSI probe into the T10 partial lamina opening prior to placement of the  
423 paddle lead (Fig. 1A). Informed consent was obtained from all patients after the nature of  
424 the study and possible risks were clearly explained, in compliance with protocols and  
425 experimental procedures approved by the USC Institutional Review Board.

426

#### 427 *Patient bladder pressure signal acquisition*

428 The urodynamic assessments in this study were conducted using the Laborie Goby (TM)  
429 urodynamics system to fill, empty and acquire continuous intravesical bladder pressure  
430 measurements of patients. A LaborieT-DOC (TM) catheter was inserted into the bladder,  
431 after patients were anesthetized. The position was confirmed by irrigation and aspiration.  
432 The infusion port of the catheter was connected to a drainage bag and the manometer  
433 port was connected to the Laborie UDS Roam Bluetooth transmitter. The patients were  
434 then positioned prone. To begin experiments, the infusion port of the catheter was  
435 connected to the infusion tubing and fUSI recordings were performed simultaneously with  
436 the urodynamics (See details of the experimental protocols below).

437

#### 438 *Functional ultrasound imaging data acquisition*

439 The spinal cord hemodynamic signals were acquired with a fully featured commercial  
440 Iconeus One (Iconeus, Paris, France) fUSI system. A 128-element linear array transducer  
441 probe with a 15 MHz center frequency and 0.1 mm pitch was inserted through the laminar  
442 opening to generate fUSI images (Fig. 1A). This approach enables image acquisition with

443 spatial resolution of 100  $\mu\text{m}$   $\times$  100  $\mu\text{m}$  in-plane, slice thickness of 400  $\mu\text{m}$ , and FOV of  
444 12.8 mm (width)  $\times$  10 (depth) mm. The penetration depth was sufficient to image the  
445 dorsal portion and part of the ventral portion of the spinal cord on a transverse orientation.  
446 The probe was fixed steadily throughout experiments with the FOV transverse and  
447 intersecting the spinal cord central canal (Fig. 2). Each image was obtained from 200  
448 compounded frames using 11 tilted plane waves separated by 2° (i.e., from -10° to +10°  
449 increment by 2°), at a 500 Hz frame rate. Imaging sessions were performed using a real-  
450 time continuous acquisition of successive blocks of 400 ms (with 600 ms pause between  
451 pulses) of compounded plane wave images, with a 5500 Hz pulse repetition frequency  
452 (PRF). The acoustic amplitudes and intensities of the fUSI sequence remained below the  
453 Food and Drug Administration limits for ultrasonic diagnostic imaging (FDA, 510k, Trace  
454 3).

455

#### 456 *Experimental protocol*

457 A 26-min continuous fUSI signal acquisition protocol was employed for all patients. The  
458 protocol consisted of 5 min fUSI spinal cord baseline recording followed by simultaneous  
459 bladder intravesical pressure signal and fUSI signal acquisition, including 2 bladder filling  
460 cycles and 1 emptying cycle, interspersed by 2 hold periods and a wash-out period at the  
461 end (Fig. 1B). At the 5-min mark, we filled the patients' bladder through a catheter with  
462 600 ml of saline at a rate of 90 ml/min for approximately 6 min and 40 s, while  
463 simultaneously recording the bladder pressure. The filling was paused for about 1 min  
464 and 30 s, followed by additional bladder filling with saline for about 1 min. We then  
465 stopped the pump for 1 min and 30 s and reversed the pump to continuously withdraw

466 saline via the catheter for 7 min and 40 s at a rate of 90 ml/min, with continuous recording  
467 of the bladder pressure. The pump was turned off, then followed by approximately 2 min  
468 and 20 s of additional fUSI spinal cord and bladder pressure signal recordings.

469

## 470 ***Data analysis***

### 471 *Data preprocessing:*

472 A built-in phase-correlation based sub-pixel motion registration<sup>52</sup> and singular-value-  
473 decomposition (SVD) based clutter filtering algorithms<sup>53</sup>, in the Iconeus One acquisition  
474 system were used to separate tissue motion signal from blood signal to generate relative  
475 pD signal intensity images<sup>54</sup>. We adopted rigid motion correction techniques<sup>55</sup> that have  
476 successfully been used in fUSI<sup>21,23,30</sup> and other neuroimaging studies<sup>56–58</sup>, to address  
477 potential physiological and motion artifacts unique to human spinal cord imaging. This  
478 was combined with in-house high frequency smoothing filtering. We utilized a lowpass  
479 filter with normalized passband frequency of 0.04 Hz, with a stopband attenuation of 60  
480 dB that compensates for delay introduced by the filter, to remove high-frequency  
481 fluctuations in the pD signals.

482

### 483 *Spatiotemporal correlation of bladder pressure changes to $\Delta$ SCBV*

484 We assessed the spatiotemporal effects of bladder filling and emptying on spinal cord  
485 hemodynamics. We generated pixel-wise activation time course curves of  $\Delta$ SCBV as a  
486 percentage change of the pD signal relative to baseline activity for the whole spinal cord  
487 FOV. The mean pD signal activity acquired 1 min preceding the onset of the bladder

488 filling was utilized as the baseline for the analysis. We investigated whether there are  
489 spinal cord regions where  $\Delta$ SCBV is correlated with the bladder pressure during filling  
490 and emptying. To test this hypothesis, we computed Pearson correlation coefficients for  
491 each pixel in the spinal cord fUSI image. To this end, the %pD signal intensity time series  
492 curve from each pixel is correlated with the bladder pressure signal across time to  
493 determine pixels with statistically significant correlation ( $p < 0.01$ , with FDR correction).  
494 We generated statistical correlation activation maps of the pixels that show significant  
495 positive and negative correlations above an r-coefficient threshold ( $r > 0.35$  and  $r < -0.35$ ).  
496 Finally, to visualize the temporal dynamics of the percentage  $\Delta$ SCVB, we derived the  
497 mean % pD signal change curves from averaging the signal over the pixels with significant  
498 correlation to the bladder pressure signal.

499

#### 500 *Decoding bladder pressure dynamics from SCBV signals*

501 Next, we attempted to identify spinal cord regions with  $\Delta$ SCBV that captures the temporal  
502 changes of the bladder pressure, without direct knowledge of the bladder pressure signal.  
503 We utilized a machine learning algorithm cPCA+SVM that includes the following steps:  
504 1) align the preprocessed SCBV signals extracted from the bladder filling and emptying  
505 time epochs, 2) reduce data dimensionality and select features that optimally allow  
506 discrimination between filling and emptying states, 3) dissociate and identify relevant  
507 spinal cord areas that encode the bladder pressure dynamics and 4) cross validate and  
508 evaluate the decoder performance (Fig. 4). To do so, we determined the percentage  
509 change in pD signal in each pixel of the fUSI images extracted during the filling and  
510 emptying epochs for each patient, relative to reference signal activity. The signals



511 acquired 30 s just before the onset of filling and 30 s before onset of emptying (i.e., during  
512 the 2<sup>nd</sup> hold period) were used as reference to calculate the %pD signal change for each  
513 pixel during the filling and emptying periods, respectively. The entire fUSI spinal cord 2D  
514 image space was utilized in the machine learning algorithm (Fig. 4A). Each 2D time series  
515 data was vectorized to 1D vectors and aligned in rows to form 2D (pixels × time) matrix  
516 classes (filling – class:0 and emptying – class:1) (Fig. 4B). We employed classwise  
517 principal component analysis (cPCA) <sup>31,32</sup> and support vector machines discrimination  
518 (SVM) <sup>59</sup>, to reduce data sparsity and dimensionality while maintaining enough  
519 components to retain over 95% variance in the data and to select the most relevant  
520 subspaces to separate the classes. SVMs provide a set of supervised learning tools for  
521 classification that are effective for high-dimensional spaces even when the feature  
522 dimensions are larger than the number of samples – such as the data employed in this  
523 study. We combined cPCA with SVM to classify the cPCA-transformed fUSI image into  
524 filling (class:0) and emptying (class:1) bladder pressure states. This analysis provides  
525 weights that reflect the most relevant pixels used for classifying between classes (Fig.  
526 4C). The relevant pixels represent a feature extraction mapping to the 2D spinal cord  
527 image space and are derived from the two 1D low-dimension subspaces that are  
528 optimized for each class. The subspaces identify pixels in the spinal cord fUSI images  
529 that encode the differences between the filling and emptying classes, when projected  
530 back to the image space. Each pixel is assigned a relative weight of relevance  
531 (normalized between [-1 1] – pixels with values close to +1 or -1 indicate high relevance  
532 components, while pixels with values close to 0 are less important and whose fluctuations  
533 are likely due to noise).  $\Delta$ SCBV of pixels with positive and negative relative weights of

534 relevance are positively and negatively correlated with bladder pressure changes,  
535 respectively.

536

### 537 *Optimal data amount for training and cross-validating the classifier*

538 Next, to investigate the optimal amount of data needed to generate the best correlation  
539 between  $\Delta$ SCBV and bladder pressure, we employed a similar cPCA+SVM analysis as  
540 outlined above with a sliding window of cumulative data amounts. We utilized 30 s of  
541 initial data followed by 10 s increments to derive the cumulative data used to train and  
542 cross-validate the classifier. We assumed that data acquired at the end of the filling period  
543 are more comparable to the data acquired at the onset of emptying and thus, we  
544 accumulated the filling data in reverse order (Fig. 4D). We followed comparable cPCA  
545 and SVM classification steps as outlined above with increasing data amounts. Each data  
546 amount produced a corresponding relevant weighted pixels-matrix and associated mean  
547 % pD signal change time course curves (Fig. 4D, highlighted panel), relative to the  
548 reference activity. To determine the optimal amount of data and pixel weights, we utilized  
549 the mean % pD signal changes derived from the weighted regions for each patient to  
550 determine the correlation between the pD signal curve resulting for each cumulative data  
551 amount and the bladder pressure signal (Fig. 4D, highlighted panel). The data amount  
552 corresponding to the highest correlation coefficient was utilized to select the optimal pixel  
553 weights and % pD signal change curve. To cross-validate the classification analysis, we  
554 allocated a subset from each data class for training (80%) and testing (20%).

555

556 *Software analysis*

557 All data pre- and post-processing and statistical analysis were performed using Matlab  
558 Version 9.13.0.2193358 (R2022b).

559

560 *Data availability*

561 The datasets generated and analyzed during the current study are available from the  
562 corresponding authors on reasonable request.

563

564 *Acknowledgments:*

565 We thank the participants that made this study possible. This work was supported by “The  
566 USC Neurorestoration Center” at the University of Southern California, “The Hellman  
567 Foundation” and the “Marlan and Rosemary Bourns College of Engineering” at the  
568 University of California Riverside through start-up funding.

569

570 *Author Contributions*

571 D.J.L., E.I.K, V.R.E., C.L. and V.N.C conceived the study.; D.J.L. performed the surgeries;  
572 D.J.L., W.C., A.A., Y.T.L., and K.W. acquired the functional ultrasound data; K.A.A.  
573 performed the functional ultrasound data processing, statistical and machine learning

574 decoding analysis; K.A.A., D.J.L. and V.N.C drafted the manuscript with substantial  
575 contribution from J.R., E.I.K, V.R.E. and C.L.; All authors edited and approved the final  
576 version of the manuscript; C.L. and V.N.C. supervised the research.

577

578 Competing interests

579 The authors declare no competing interests.

580

581

582 **Figure captions**

583

584 **Figure 1. Experimental setup and fUSI acquisition protocol.** **A)** A graphical  
585 representation of the human urodynamic model developed to study how the spinal cord  
586 activity is correlated with the bladder pressure. The spinal cord fUSI acquisition performed  
587 through a laminar window using a miniaturized 15.6-MHz, 128-channel, linear ultrasound  
588 transducer array. **B)** The experimental protocol for urodynamically-controlled filling and  
589 emptying the bladder. **(C)** Bladder pressure recordings across time during filling and  
590 emptying the bladder for the 4 patients.

591

592 **Figure 2. Functional ultrasound imaging of the spinal cord in a transverse plane.**  
593 **A)** Cross section of spinal cord anatomy. The green area illustrates approximately the  
594 field of view of fUSI acquisition. **(B)** Power Doppler-based vascular maps showing the  
595 transverse section of the spinal cord of the four patients.

596

597 **Figure 3. Activation maps of the correlation between  $\Delta$ SCBV and bladder pressure**  
598 **during filling and emptying the bladder.** **A)** Activation maps of the 4 patients that  
599 illustrate spinal cord regions that are positively (reddish) and negatively (blueish)  
600 correlated with the bladder pressure during filling and emptying the bladder. **B) Left panel:**  
601 Average  $\Delta$ SCBV (i.e., % pD signal changes) from the baseline activity of bladder  
602 pressure-related regions for each of the 4 patients. Positive correlations with bladder  
603 pressure are depicted in red, while negative correlations are shown in blue. *Right panel:*  
604 Same as the left panel but across all 4 patients. **C)** Average normalized  $\Delta$ SCBV of the  
605 spinal cord regions that are positively (red curve) and negatively (blue curve) correlated  
606 with the bladder pressure across patients. The gray curve depicts the normalized changes  
607 of the bladder pressure during the urodynamic experiment. The shaded regions around  
608 the bladder pressure and the  $\Delta$ SCBV curves represent the standard error derived from  
609 averaging across patients.

610

611 **Figure 4. Flowchart of the cPCA+SVM algorithm developed to detect bladder**  
612 **pressure-related spinal cord regions. A)** fUSI data during filling (class 0, c0) and  
613 emptying (class 1, c1) the bladder were recorded at the level of the T10 vertebral body  
614 and **B)** separated in training images and testing images based on the cross-validation  
615 technique used – 80% training data and 20% testing data. **C)** cPCA was paired with SVM  
616 to classify the state of the bladder (i.e., class 0 vs. class 1) using only the recorded pD  
617 signal from the spinal cord. **D)** This approach results in a 1-dimensional subspace the  
618 represents a feature extraction mapping from the 2D spinal cord image space. The  
619 subspace identifies pixels that are assigned with a relative weight between [-1, 1] and  
620 encodes the differences between the two classes – the higher the weight, the more  
621 significant the contribution of this pixel to the class separation. Highlighted panel shows  
622 the process for identifying the optimal amount of fUSI data that generate the best correlate  
623 between  $\Delta$ SCBV and bladder pressure.

624

625 **Figure 5. Bladder pressure-related spinal cord regions identified using cPCA+SVM.**  
626 **A)** Weighted map of patients P1 to P4 extracted by the cPCA+SVM algorithm using all  
627 fUSI recorded data. The top 5% most heavily weighted voxels are shown. **B) Left panel:**  
628 Average  $\Delta$ SCBV from the baseline activity of bladder pressure-related regions for each  
629 of the 4 patients. Positive correlations with bladder pressure are depicted in red, while  
630 negative correlations are shown in blue. *Right panel:* Same as the left panel but across  
631 all 4 patients. **C)** Average normalized  $\Delta$ SCBV of spinal cord regions with positive weights  
632 (red curve) and negative weights (blue curve) as extracted by the cPCA+SVM algorithm  
633 using all fUSI data across the 4 patients. The shaded regions around the bladder pressure  
634 and the  $\Delta$ SCBV curves represent the standard error derived from averaging across  
635 patients. Note that positive and negative weights correspond to positive and negative  
636 correlations of  $\Delta$ SCBV with the bladder pressure.

637

638 **Figure 6. Bladder pressure-related spinal cord regions identified using cPCA+SVM**  
639 **with an optimal subset of fUSI recorded data. A)** Weighted map of patients P1 to P4  
640 extracted by the cPCA+SVM algorithm using an optimal subset of fUSI recorded data.

641 The top 5% most heavily weighted voxels are shown. **B) Left panel:** Average  $\Delta$ SCBV from  
642 the baseline activity of bladder pressure-related regions for each of the 4 patients.  
643 Positive correlations with bladder pressure are depicted in red, while negative correlations  
644 are shown in blue. *Right panel:* Same as the left panel but across all 4 patients. **C)**  
645 Average normalized  $\Delta$ SCBV of spinal cord regions with positive weights (red curve) and  
646 negative weights (blue curve) as extracted by the cPCA+SVM algorithm using an optimal  
647 subset fUSI data across the 4 patients. The shaded regions around the bladder pressure  
648 and the  $\Delta$ SCBV curves represent the standard error derived from averaging across  
649 patients. Note that positive and negative weights correspond to positive and negative  
650 correlations of  $\Delta$ SCBV with the bladder pressure.

651

652

653 *References*

654

- 655 1. Cramer, G. D. & Darby, S. A. *Clinical Anatomy of the Spine, Spinal Cord, and ANS*. (Elsevier Health  
656 Sciences, 2017).
- 657 2. Steuer, I. & Guertin, P. A. Central pattern generators in the brainstem and spinal cord: an overview  
658 of basic principles, similarities and differences. *Rev Neurosci* **30**, 107–164 (2019).
- 659 3. Frigon, A. Central pattern generators of the mammalian spinal cord. *Neuroscientist* **18**, 56–69  
660 (2012).
- 661 4. Roy, H. A. & Green, A. L. The Central Autonomic Network and Regulation of Bladder Function. *Front*  
662 *Neurosci* **13**, 535 (2019).
- 663 5. Giove, F. *et al.* Issues about the fMRI of the human spinal cord. *Magnetic Resonance Imaging* **22**,  
664 1505–1516 (2004).
- 665 6. Eippert, F., Kong, Y., Jenkinson, M., Tracey, I. & Brooks, J. C. W. Denoising spinal cord fMRI data:  
666 Approaches to acquisition and analysis. *NeuroImage* **154**, 255–266 (2017).
- 667 7. Stroman, P. W. *et al.* The current state-of-the-art of spinal cord imaging: methods. *NeuroImage* **84**,  
668 1070–81 (2014).
- 669 8. Powers, J. M., Ioachim, G. & Stroman, P. W. Ten Key Insights into the Use of Spinal Cord fMRI. *Brain*  
670 *sciences* **8**, (2018).
- 671 9. Kinany, N. *et al.* Towards reliable spinal cord fMRI: Assessment of common imaging protocols.  
672 *NeuroImage* **250**, 118964 (2022).
- 673 10. Weber, K. A. *et al.* Assessing the spatial distribution of cervical spinal cord activity during tactile  
674 stimulation of the upper extremity in humans with functional magnetic resonance imaging.  
675 *NeuroImage* **217**, 116905 (2020).
- 676 11. Kinany, N., Pirondini, E., Micera, S. & Van De Ville, D. Dynamic Functional Connectivity of Resting-  
677 State Spinal Cord fMRI Reveals Fine-Grained Intrinsic Architecture. *Neuron* **108**, 424-435.e4 (2020).



- 678 12. Fowler, C. J., Griffiths, D. & de Groat, W. C. The neural control of micturition. *Nat Rev Neurosci* **9**,  
679 453–466 (2008).
- 680 13. Brooks, J. C. W. *et al.* Stimulus site and modality dependence of functional activity within the human  
681 spinal cord. *J Neurosci* **32**, 6231–6239 (2012).
- 682 14. Deffieux, T., Demene, C., Pernot, M. & Tanter, M. Functional ultrasound neuroimaging: a review of  
683 the preclinical and clinical state of the art. *Current opinion in neurobiology* **50**, 128–135 (2018).
- 684 15. Tanter, M. & Fink, M. Ultrafast imaging in biomedical ultrasound. *IEEE Transactions on Ultrasonics,*  
685 *Ferroelectrics, and Frequency Control* **61**, 102–119 (2014).
- 686 16. Macé, E. *et al.* Functional ultrasound imaging of the brain. *Nat Methods* **8**, 662 (2011).
- 687 17. Baranger, J. *et al.* Bedside functional monitoring of the dynamic brain connectivity in human  
688 neonates. *Nature Communications* **12**, 1080 (2021).
- 689 18. Demené, C. *et al.* 4D microvascular imaging based on ultrafast Doppler tomography. *NeuroImage*  
690 **127**, 472–483 (2016).
- 691 19. Osmanski, B. F. *et al.* Functional ultrasound imaging reveals different odor-evoked patterns of  
692 vascular activity in the main olfactory bulb and the anterior piriform cortex. *NeuroImage* **95**, 176–  
693 184 (2014).
- 694 20. Sieu, L. A. *et al.* EEG and functional ultrasound imaging in mobile rats. *Nature methods* **12**, 831–4  
695 (2015).
- 696 21. Norman, S. L. *et al.* Single-trial decoding of movement intentions using functional ultrasound  
697 neuroimaging. *Neuron* **109**, 1554-1566.e4 (2021).
- 698 22. Imbault, M., Chauvet, D., Gennisson, J.-L., Capelle, L. & Tanter, M. Intraoperative Functional  
699 Ultrasound Imaging of Human Brain Activity. *Scientific Reports* **7**, 7304 (2017).
- 700 23. Griggs, W. S. *et al.* Decoding motor plans using a closed-loop ultrasonic brain–machine interface.  
701 *Nature Neuroscience* (2023) doi:10.1038/s41593-023-01500-7.

- 702 24. Bercoff, J. *et al.* Ultrafast compound doppler imaging: providing full blood flow characterization.  
703 *IEEE Transactions on Ultrasonics, Ferroelectrics, and Frequency Control* **58**, 134–147 (2011).
- 704 25. Mace, E. *et al.* Functional ultrasound imaging of the brain: theory and basic principles. *IEEE*  
705 *Transactions on Ultrasonics, Ferroelectrics, and Frequency Control* **60**, 492–506 (2013).
- 706 26. Claron, J. *et al.* Large-scale functional ultrasound imaging of the spinal cord reveals in-depth  
707 spatiotemporal responses of spinal nociceptive circuits in both normal and inflammatory states.  
708 *PAIN* **162**, (2021).
- 709 27. Soloukey, S. *et al.* Towards High-Resolution functional Ultrasound (fUS) Imaging of the Murine  
710 Spinal Cord. in 2259–2262 (2019). doi:10.1109/ULTSYM.2019.8926243.
- 711 28. Song, P. *et al.* Functional Ultrasound Imaging of Spinal Cord Hemodynamic Responses to Epidural  
712 Electrical Stimulation: A Feasibility Study. *Frontiers in neurology* **10**, 279 (2019).
- 713 29. Tang, S. *et al.* Changes in spinal cord hemodynamics reflect modulation of spinal network with  
714 different parameters of epidural stimulation. *NeuroImage* **221**, 117183 (2020).
- 715 30. Agyeman, K. A. *et al.* Functional Ultrasound Imaging of the Human Spinal Cord. *bioRxiv*  
716 2022.08.06.503044 (2022) doi:10.1101/2022.08.06.503044.
- 717 31. Das, K. & Nenadic, Z. An efficient discriminant-based solution for small sample size problem. *Pattern*  
718 *Recognition* **42**, 857–866 (2009).
- 719 32. Das, K., Osechinskiy, S. & Nenadic, Z. A classwise PCA-based recognition of neural data for brain-  
720 computer interfaces. *Annual International Conference of the IEEE Engineering in Medicine and*  
721 *Biology Society. IEEE Engineering in Medicine and Biology Society. Annual International Conference*  
722 **2007**, 6520–3 (2007).
- 723 33. Kreydin, E. I. *et al.* The effect of stroke on micturition associated brain activity: A pilot fMRI study.  
724 *Neurourol Urodyn* **39**, 2198–2205 (2020).

- 725 34. Tran, T. *et al.* Electrocorticographic Activity of the Brain During Micturition. *Annu Int Conf IEEE Eng*  
726 *Med Biol Soc* **2018**, 3622–3625 (2018).
- 727 35. Komesu, Y. M., Ketaj, L. H., Mayer, A. R., Teshiba, T. M. & Rogers, R. G. Functional MRI of the Brain  
728 in Women with Overactive Bladder: Brain Activation During Urinary Urgency. *Female Pelvic Med*  
729 *Reconstr Surg* **17**, 50–54 (2011).
- 730 36. Costantini, I., Cicchi, R., Silvestri, L., Vanzi, F. & Pavone, F. S. In-vivo and ex-vivo optical clearing  
731 methods for biological tissues: review. *Biomedical optics express* **10**, 5251–5267 (2019).
- 732 37. Jacques, S. L. Optical properties of biological tissues: a review. *Physics in medicine and biology* **58**,  
733 R37-61 (2013).
- 734 38. Hubscher, C. H. *et al.* Improvements in bladder, bowel and sexual outcomes following task-specific  
735 locomotor training in human spinal cord injury. *PLoS One* **13**, e0190998 (2018).
- 736 39. Goetz, L. L. & Klausner, A. P. 20 - Neurogenic Lower Urinary Tract Dysfunction. in *Braddom's Physical*  
737 *Medicine and Rehabilitation (Sixth Edition)* (ed. Cifu, D. X.) 389-406.e2 (Elsevier, Philadelphia, 2021).  
738 doi:10.1016/B978-0-323-62539-5.00020-5.
- 739 40. Gad, P. N. *et al.* Initiation of Bladder Voiding with Epidural Stimulation in Paralyzed, Step Trained  
740 Rats. *PLOS ONE* **9**, e108184 (2014).
- 741 41. Abud, E. M., Ichiyama, R. M., Havton, L. A. & Chang, H. H. Spinal stimulation of the upper lumbar  
742 spinal cord modulates urethral sphincter activity in rats after spinal cord injury. *Am J Physiol Renal*  
743 *Physiol* **308**, F1032-1040 (2015).
- 744 42. Gad, P. N., Kreydin, E., Zhong, H., Latack, K. & Edgerton, V. R. Non-invasive Neuromodulation of  
745 Spinal Cord Restores Lower Urinary Tract Function After Paralysis. *Front Neurosci* **12**, 432 (2018).
- 746 43. Kreydin, E. *et al.* Transcutaneous Electrical Spinal Cord Neuromodulator (TESCoN) Improves  
747 Symptoms of Overactive Bladder. *Front Syst Neurosci* **14**, 1 (2020).

- 748 44. Tiran, E. *et al.* Transcranial Functional Ultrasound Imaging in Freely Moving Awake Mice and  
749 Anesthetized Young Rats without Contrast Agent. *Ultrasound Med Biol* **43**, 1679–1689 (2017).
- 750 45. Demene, C. *et al.* Functional ultrasound imaging of brain activity in human newborns. *Sci Transl*  
751 *Med.* **9**, eaah6756 (2017).
- 752 46. Osmanski, B. F., Pezet, S., Ricobaraza, A., Lenkei, Z. & Tanter, M. Functional ultrasound imaging of  
753 intrinsic connectivity in the living rat brain with high spatiotemporal resolution. *Nat Commun* **5**,  
754 5023 (2014).
- 755 47. Claire Rabut *et al.* A window to the brain: ultrasound imaging of human neural activity through a  
756 permanent acoustic window. *bioRxiv* 2023.06.14.544094 (2023) doi:10.1101/2023.06.14.544094.
- 757 48. Errico, C. *et al.* Transcranial functional ultrasound imaging of the brain using microbubble-enhanced  
758 ultrasensitive Doppler. *Neuroimage* **124**, 752–761 (2016).
- 759 49. Demené, C. *et al.* Transcranial ultrafast ultrasound localization microscopy of brain vasculature in  
760 patients. *Nat Biomed Eng* **5**, 219–228 (2021).
- 761 50. Wein, A. J. & Moy, M. L. CHAPTER 13 - Voiding Function and Dysfunction; Urinary Incontinence. in  
762 *Penn Clinical Manual of Urology* (eds. Hanno, P. M., Malkowicz, S. B. & Wein, A. J.) 341–478 (W.B.  
763 Saunders, Philadelphia, 2007). doi:10.1016/B978-141603848-1.10013-0.
- 764 51. Malykhina, A. P. How the brain controls urination. *eLife* **6**, e33219 (2017).
- 765 52. Foroosh, H., Zerubia, J. B. & Berthod, M. Extension of phase correlation to subpixel registration. *IEEE*  
766 *Transactions on Image Processing* **11**, 188–200 (2002).
- 767 53. Ledoux, L. A., Brands, P. J. & Hoeks, A. P. Reduction of the clutter component in Doppler ultrasound  
768 signals based on singular value decomposition: a simulation study. *Ultrasonic imaging* **19**, 1–18  
769 (1997).
- 770 54. Demené, C. *et al.* Spatiotemporal Clutter Filtering of Ultrafast Ultrasound Data Highly Increases  
771 Doppler and fUltrasound Sensitivity. *IEEE Transactions on Medical Imaging* **34**, 2271–2285 (2015).

- 772 55. Pnevmatikakis, E. A. & Giovannucci, A. NoRMCorre: An online algorithm for piecewise rigid motion  
773 correction of calcium imaging data. *Journal of Neuroscience Methods* **291**, 83–94 (2017).
- 774 56. Chen, K., Kogan, J. F. & Fontanini, A. Spatially Distributed Representation of Taste Quality in the  
775 Gustatory Insular Cortex of Behaving Mice. *Current biology : CB* **31**, 247-256.e4 (2021).
- 776 57. Friedrich, J., Giovannucci, A. & Pnevmatikakis, E. A. Online analysis of microendoscopic 1-photon  
777 calcium imaging data streams. *PLOS Computational Biology* **17**, e1008565 (2021).
- 778 58. Stringer, C. & Pachitariu, M. Computational processing of neural recordings from calcium imaging  
779 data. *Current Opinion in Neurobiology* **55**, 22–31 (2019).
- 780 59. Zhou, L., Wang, L., Liu, L., Ogunbona, P. & Shen, D. Support Vector Machines for Neuroimage  
781 Analysis: Interpretation from Discrimination. in *Support Vector Machines Applications* (eds. Ma, Y. &  
782 Guo, G.) 191–220 (Springer International Publishing, Cham, 2014). doi:10.1007/978-3-319-02300-  
783 7\_6.
- 784

Figure 1

**A** Spinal cord lamina window and fUSI transducer

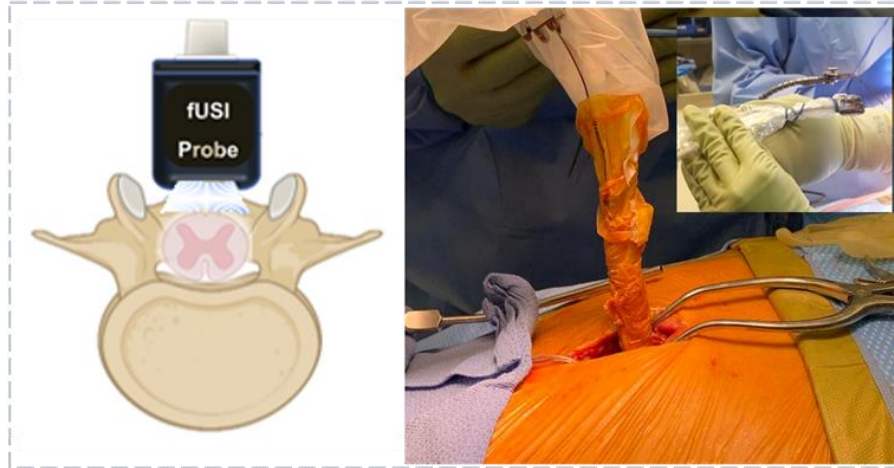

**B**

Experimental protocol

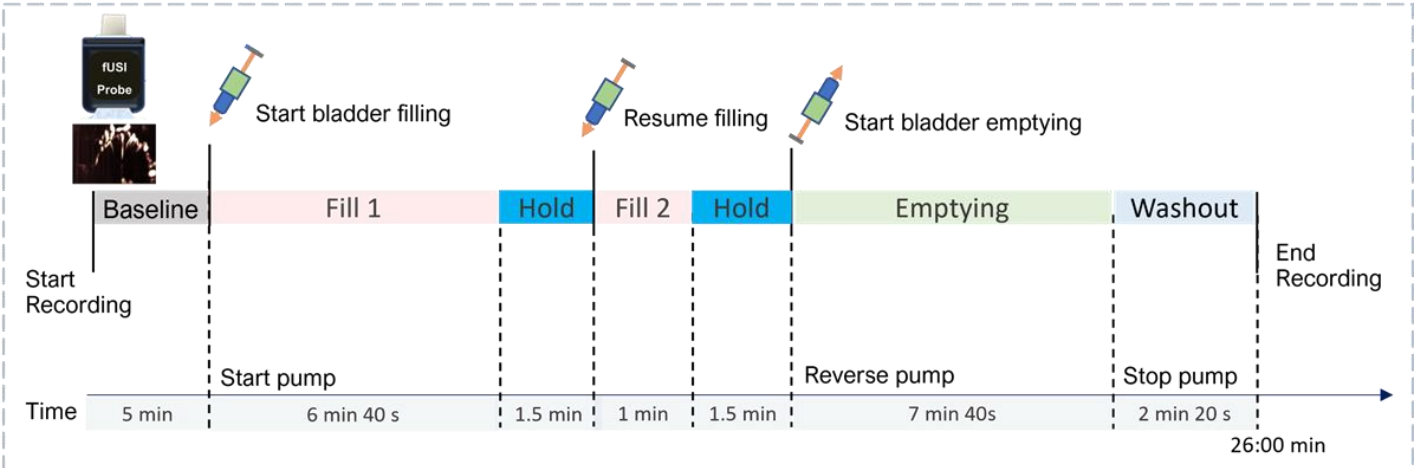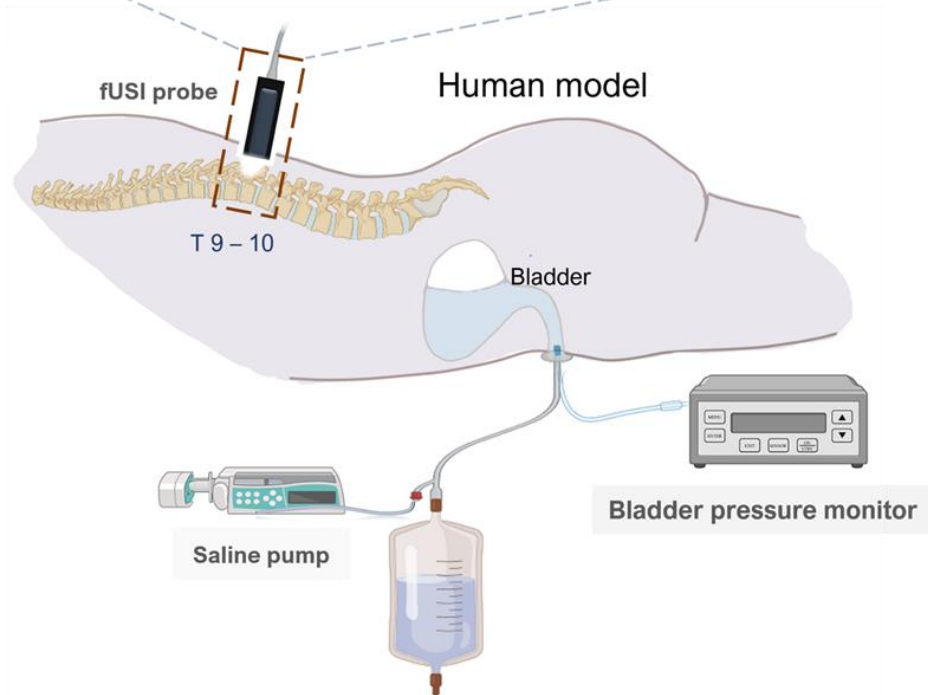

**C**

Bladder pressures curves

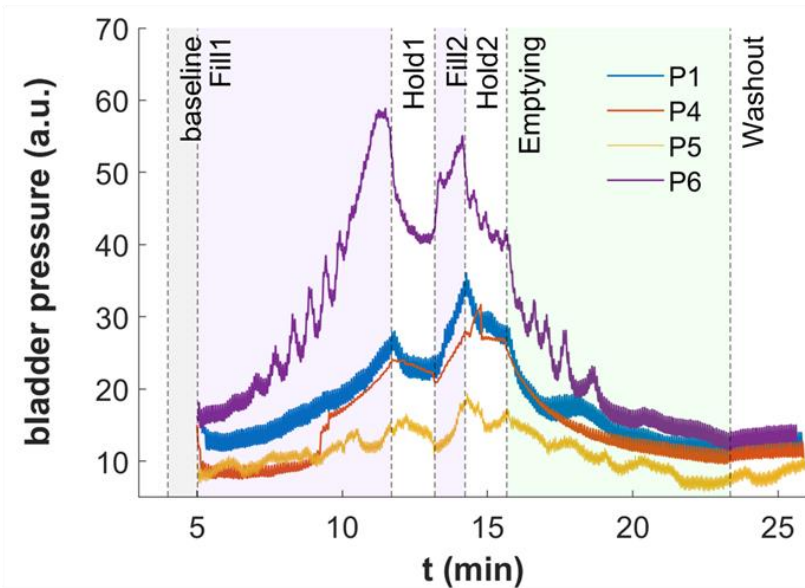

Figure 2

A

Spinal cord cross-section

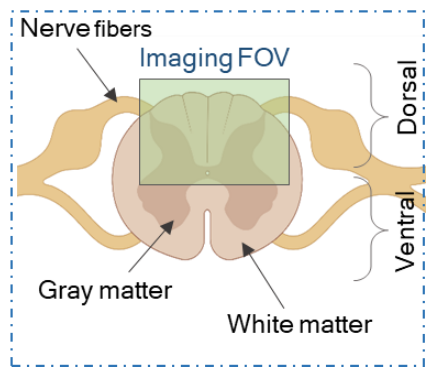

B

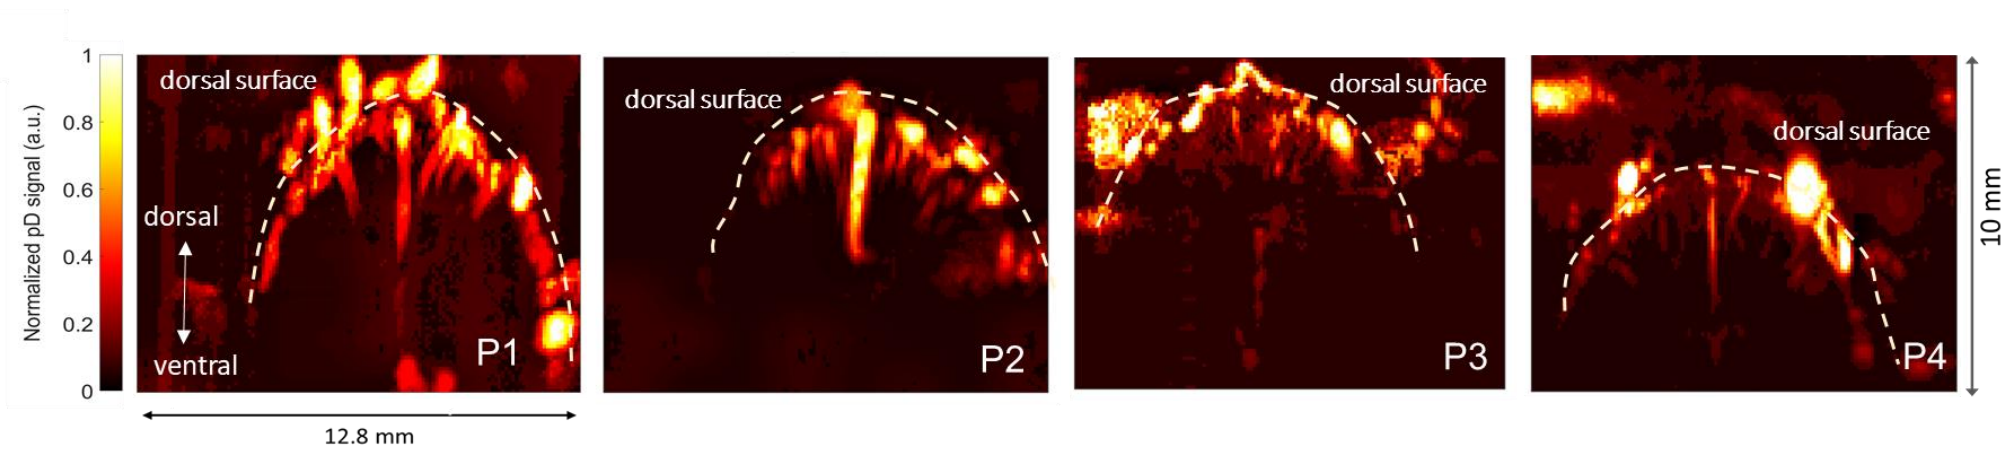

Figure 3

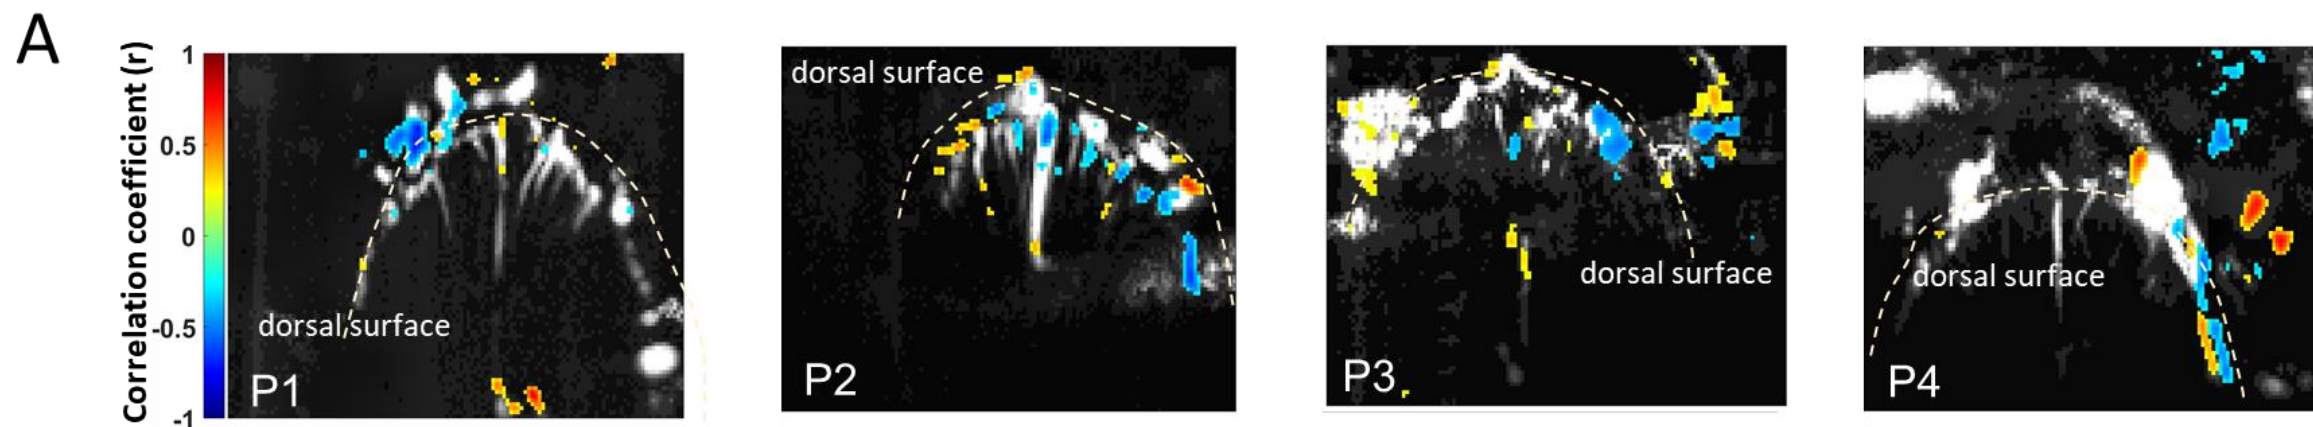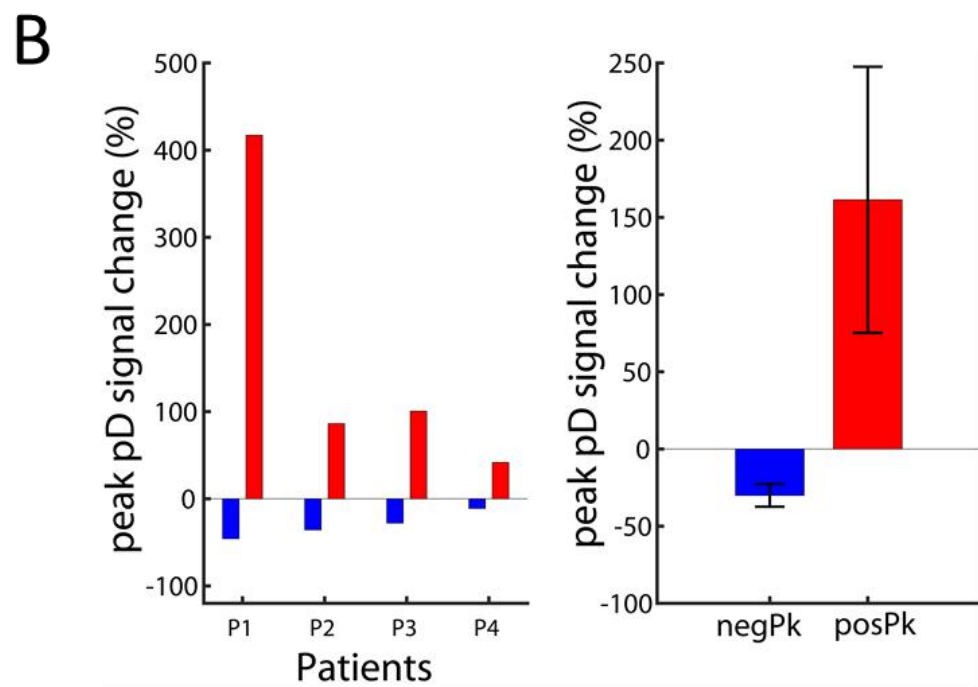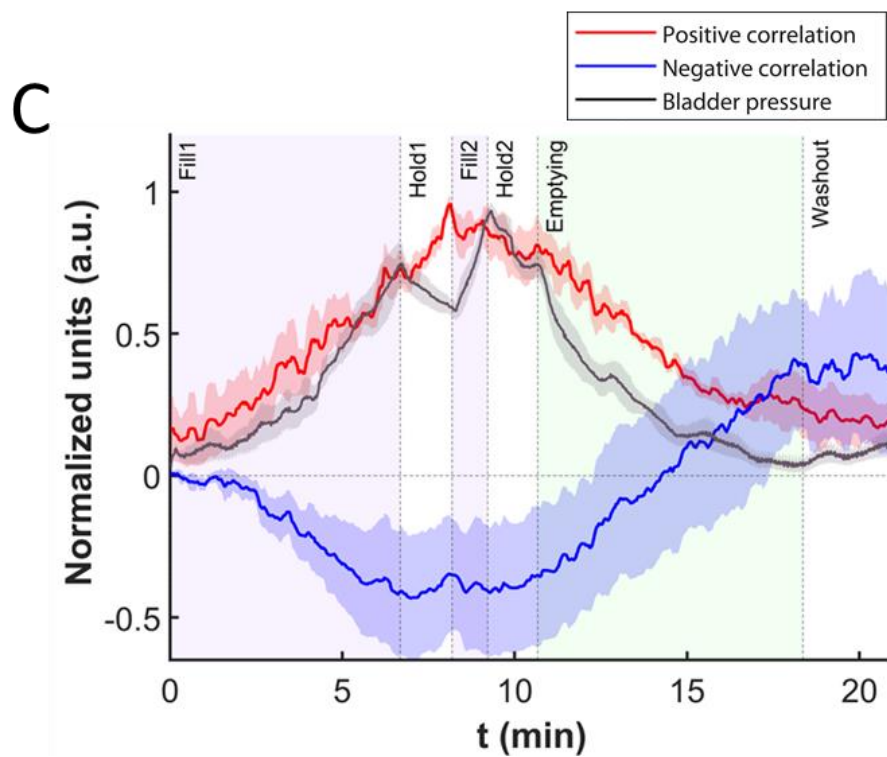



Figure 4

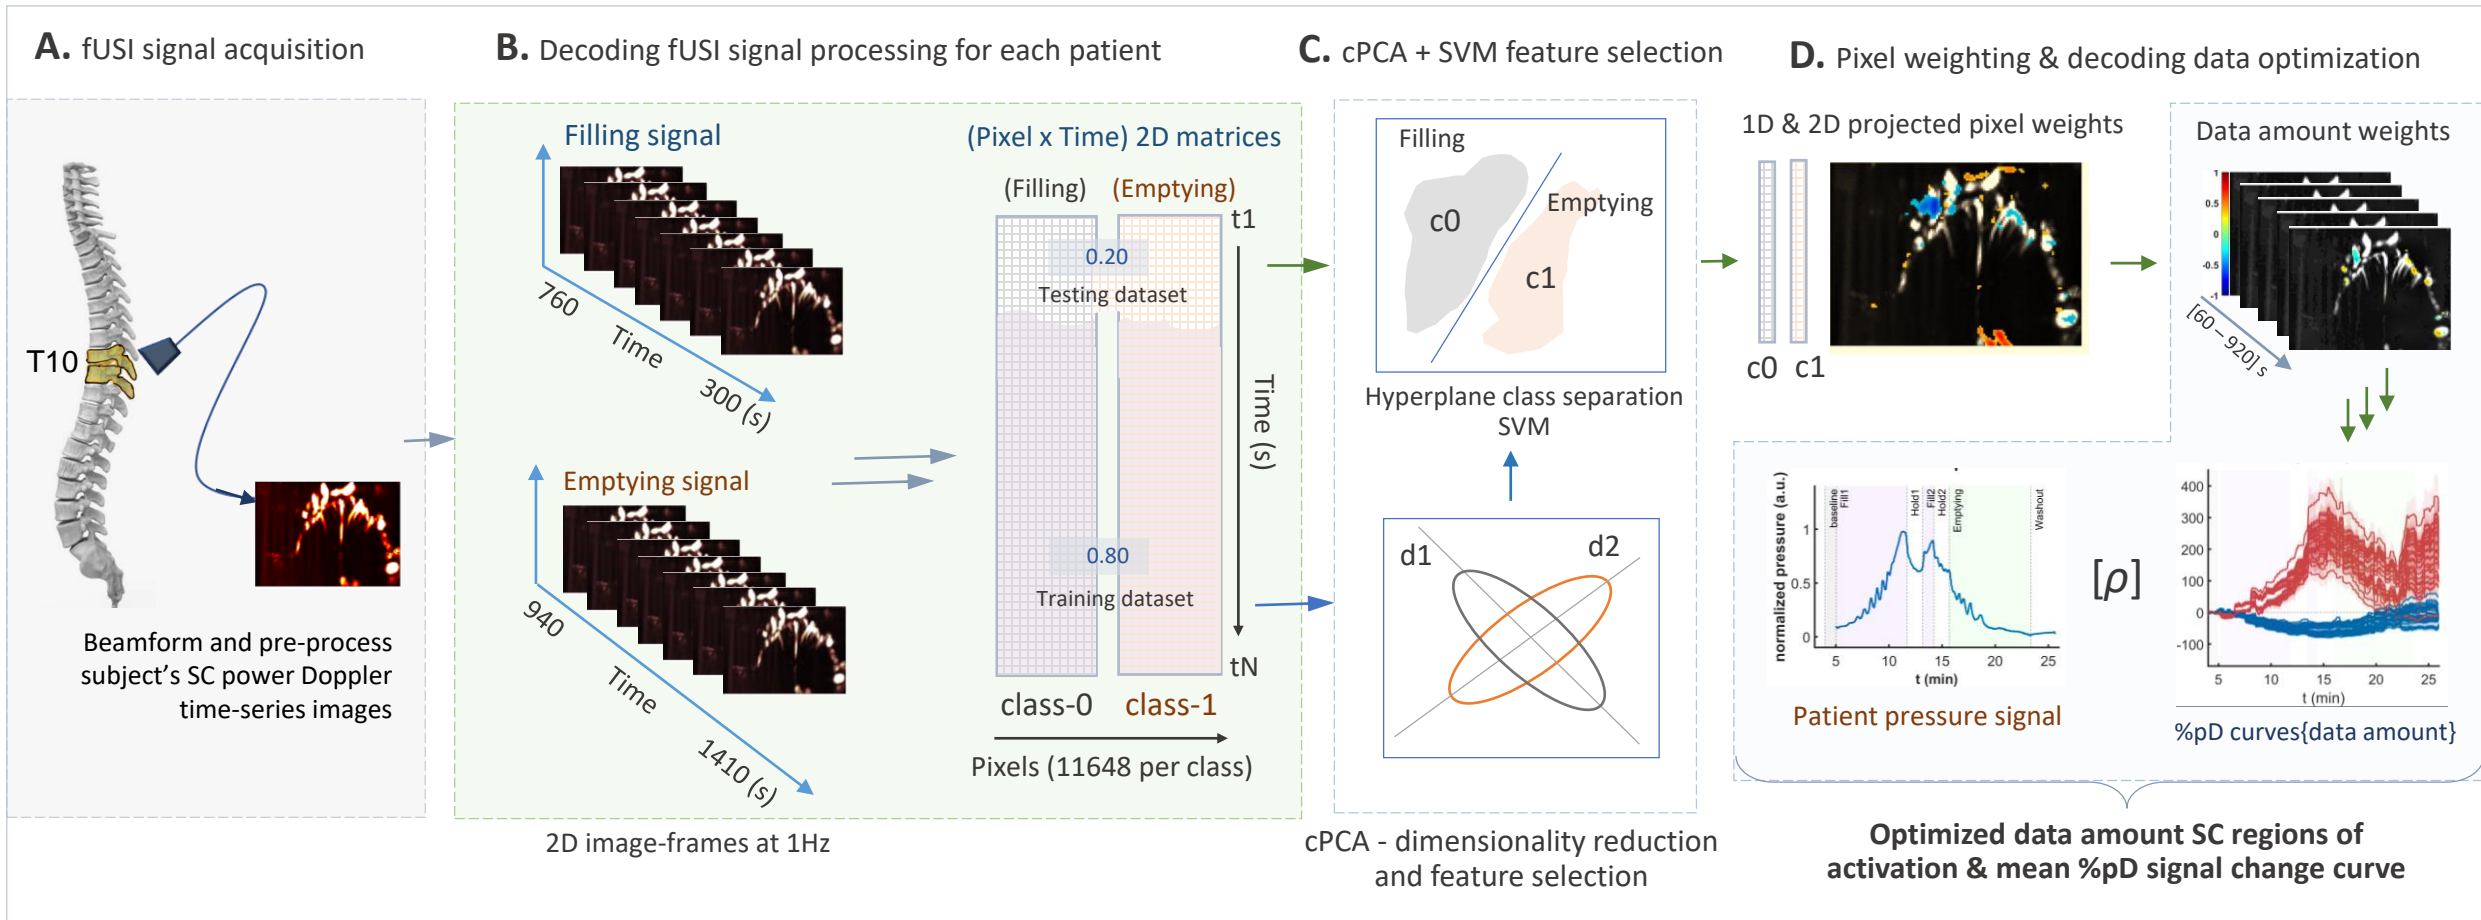

Figure 5

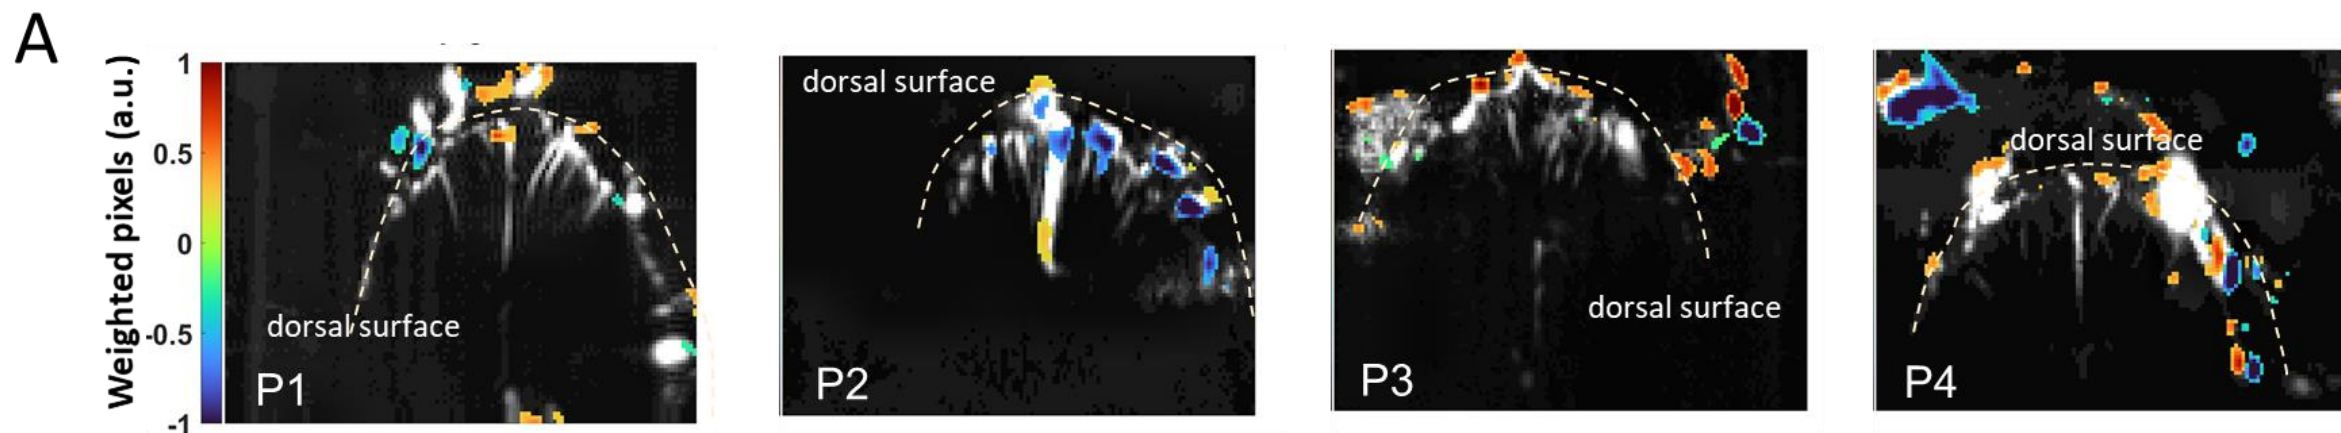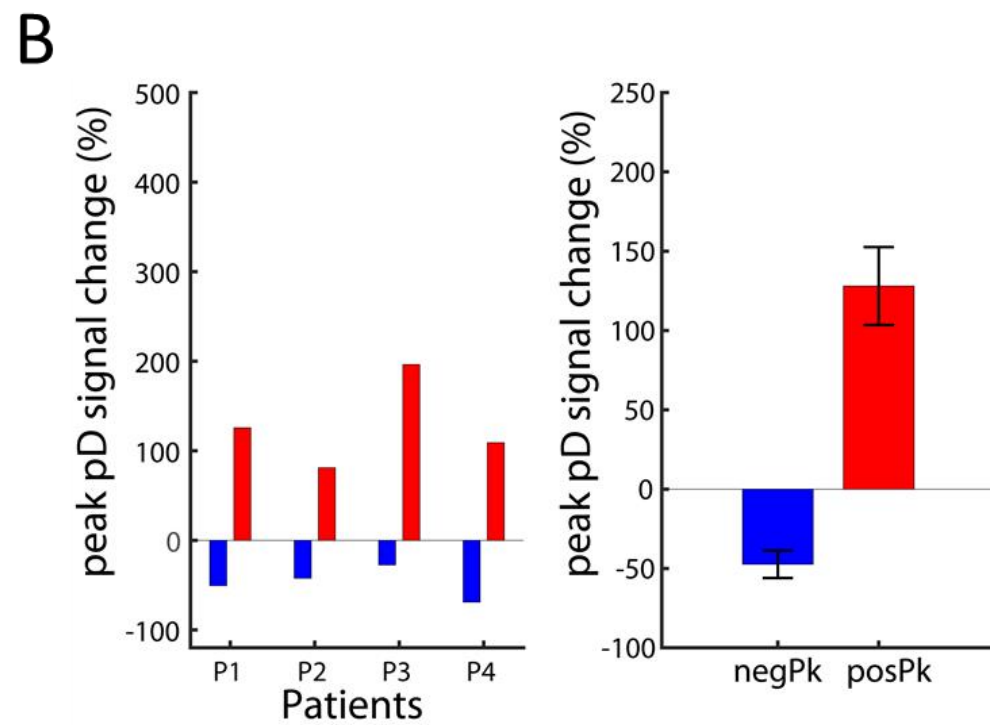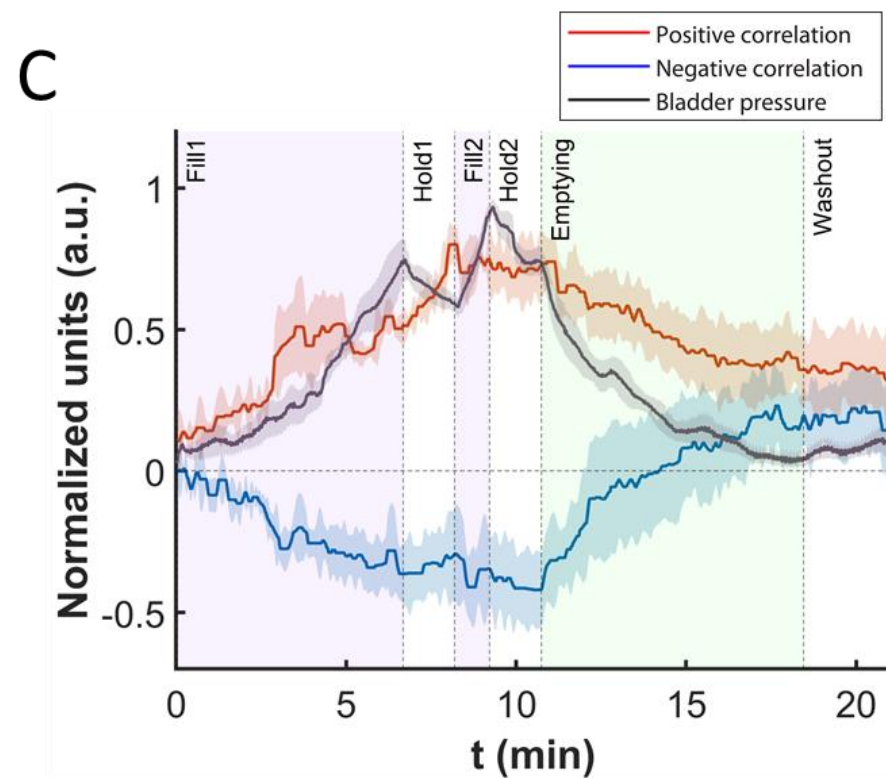

Figure 6

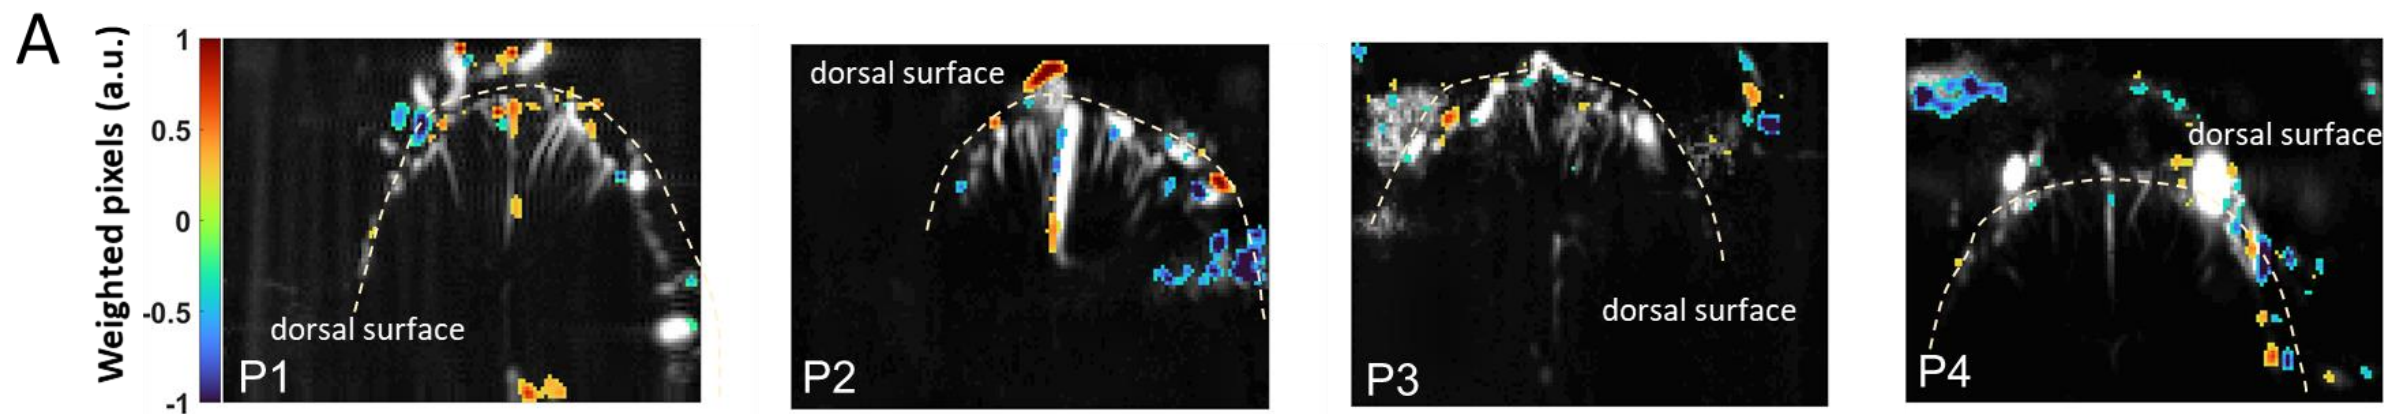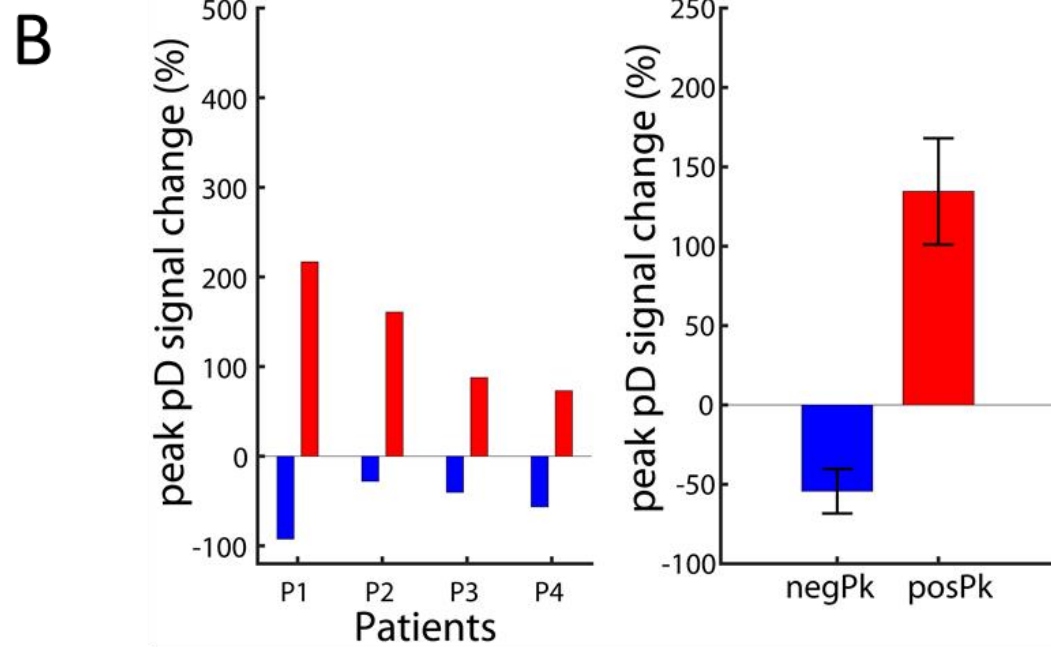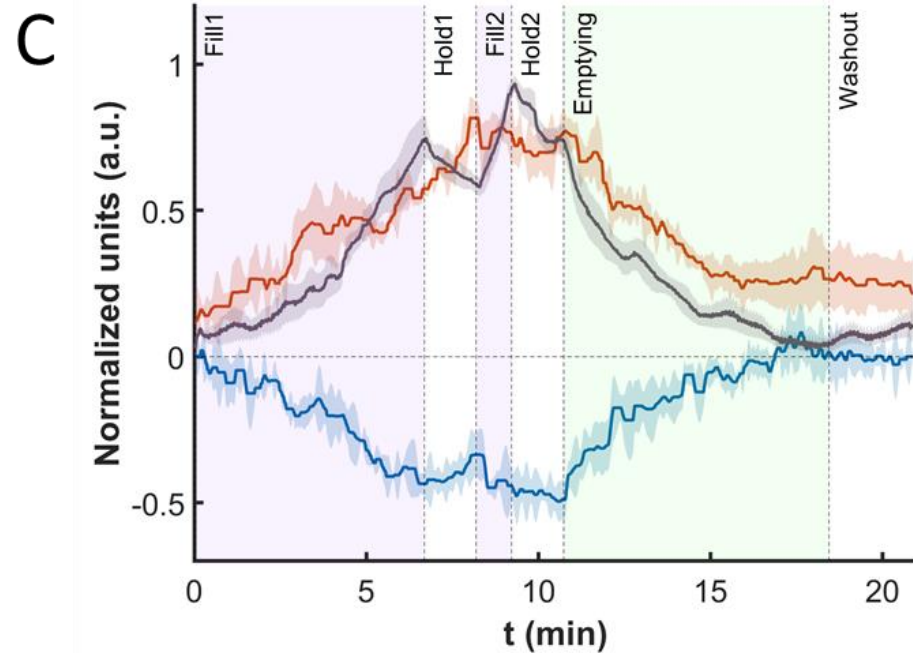

Source: https://www.biorxiv.org/content/biorxiv/early/2024/02/21/2024.02.16.580736.full.pdf
